# Supplementary material
Source: PubMed Central journal article supplement (PMC10282958)
Supplement: jamapediatr-e231747-s001.pdf [file jamapediatr-e231747-s001.pdf]

## Data Sharing Statement

Joseph. Association Between Hospital Consolidation and Loss of Pediatric Inpatient Services. *JAMA Pediatr*. Published June 20, 2023. doi:10.1001/jamapediatrics.2023.1747

### Data

**Data available:** No
